# Supplementary material for: Multiple Myeloma Risk and Outcomes Are Associated with Pathogenic Germline Variants in DNA Repair Genes
Source: PubMed Central journal article supplement — Blood Cancer Discov. 2024 Sep 16;5(6):428–41. doi: 10.1158/2643-3230.BCD-23-0208 (PMC11528192; doi:10.1158/2643-3230.bcd-23-0208), 2024-09-16

**SUPPLEMENTARY FIGURE 1: Output of Cox Proportional Hazards Model for Multivariate PFS1 Analysis in HDM-ASCT Recipients with MM (Combined Cohort).** Adjusted Hazard Ratios (HR) are shown with corresponding 95% confidence intervals. Statistically significant values are shown in red, while non-significant values are shown in cyan. After adjusting for age, ISS stage, high-risk cytogenetics, induction regimen and lenalidomide maintenance, being a PGV-A carrier remained significantly associated with longer PFS1 in MM patients who underwent HDM-ASCT in the Combined cohort. NS = non-significant.

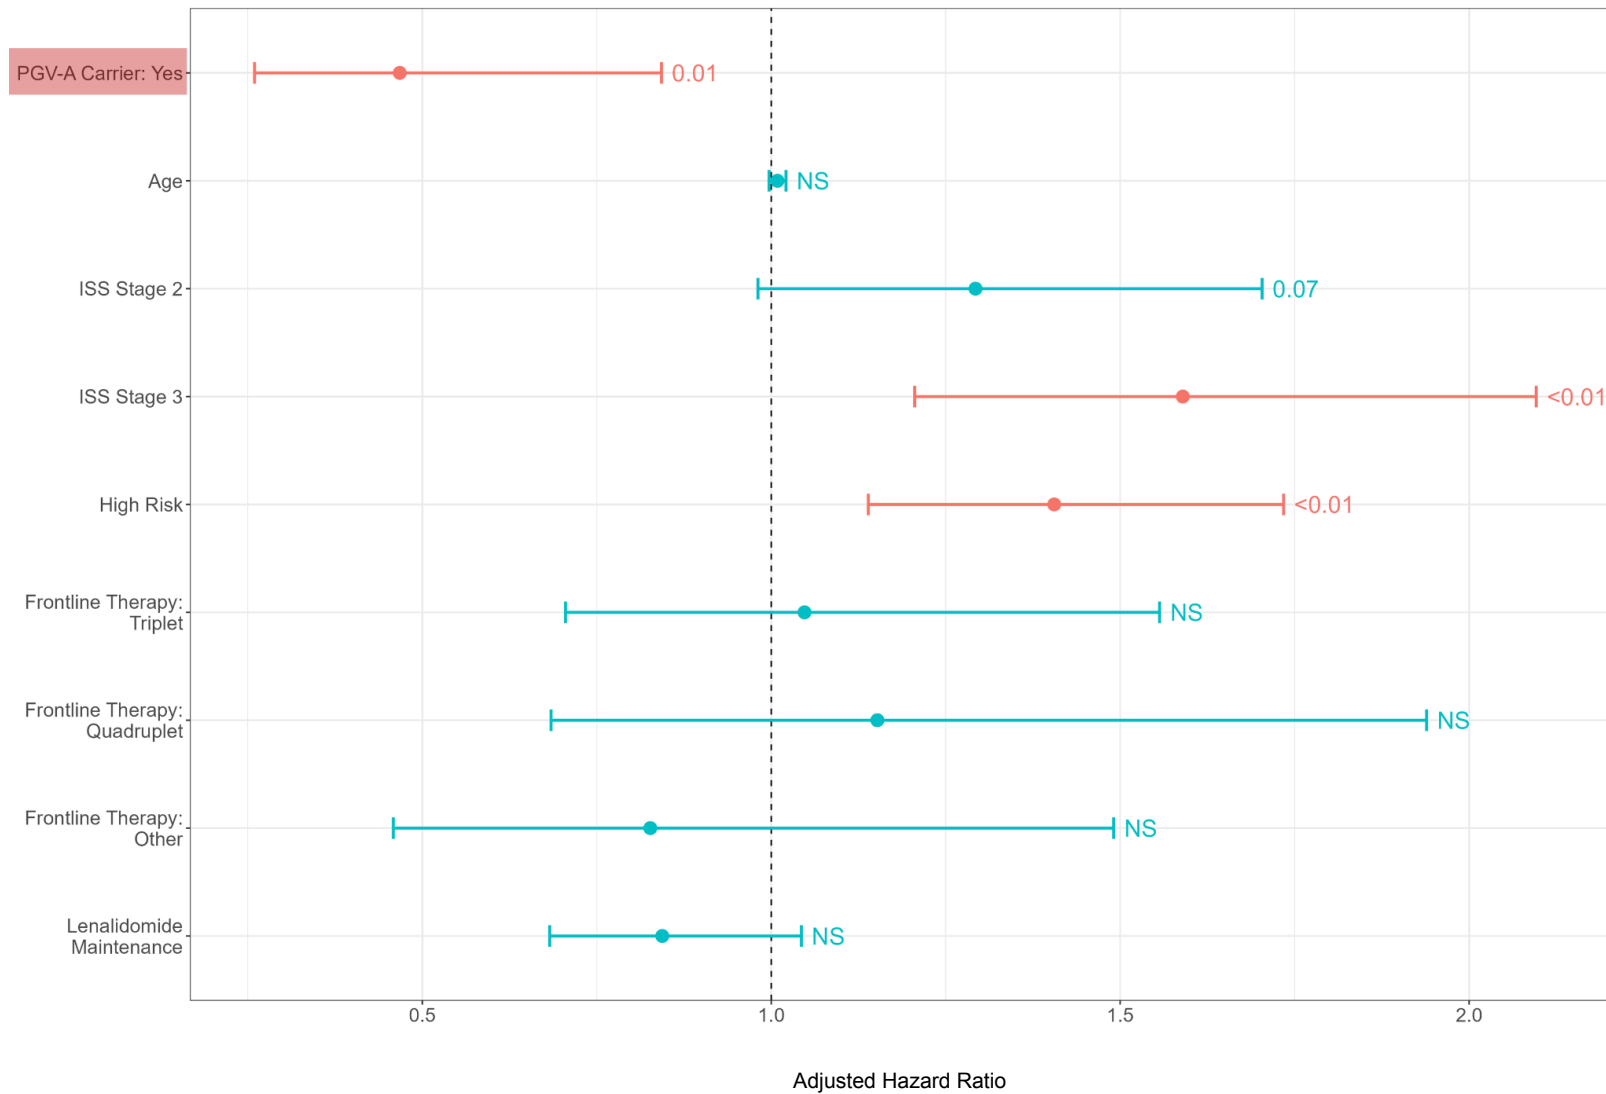

Supplement: bcd-23-0208_supplementary_figure_1_suppsf1.pdf [file bcd-23-0208_supplementary_figure_1_suppsf1.pdf]
