# Supplementary material for: Multiple Myeloma Risk and Outcomes Are Associated with Pathogenic Germline Variants in DNA Repair Genes
Source: PubMed Central journal article supplement — Blood Cancer Discov. 2024 Sep 16;5(6):428–41. doi: 10.1158/2643-3230.BCD-23-0208 (PMC11528192; doi:10.1158/2643-3230.bcd-23-0208), 2024-09-16

**Supplementary Figure 2: Overall Survival (OS) in PGV-A carriers vs non-carriers**

✚ PGV-A carriers ✚ Non-carriers

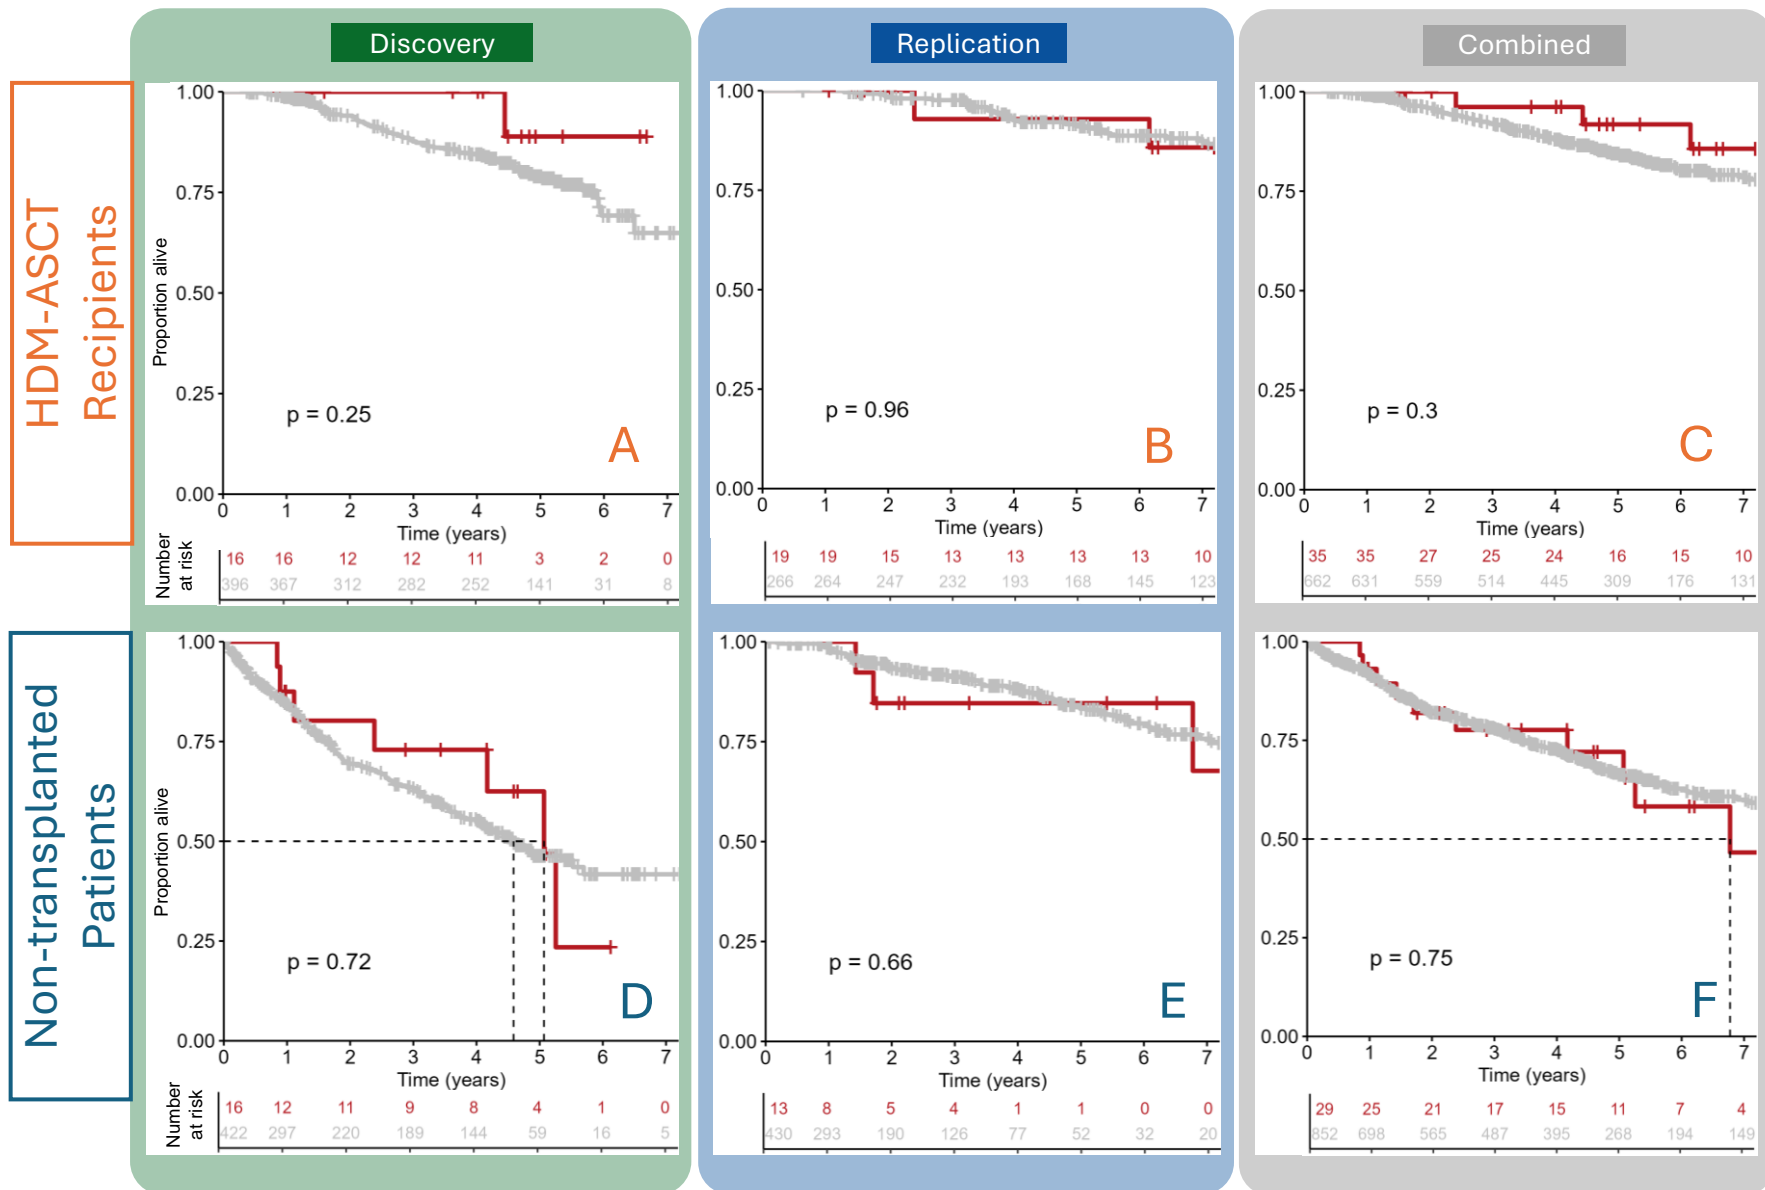

Supplement: bcd-23-0208_supplementary_figure_2_suppsf2.pdf [file bcd-23-0208_supplementary_figure_2_suppsf2.pdf]
