# Supplementary material for: Multiple Myeloma Risk and Outcomes Are Associated with Pathogenic Germline Variants in DNA Repair Genes
Source: PubMed Central journal article supplement — Blood Cancer Discov. 2024 Sep 16;5(6):428–41. doi: 10.1158/2643-3230.BCD-23-0208 (PMC11528192; doi:10.1158/2643-3230.bcd-23-0208), 2024-09-16

**Supplementary Figure 3: PFS1 and OS in PGV-B/C carriers vs non-carriers (combined cohort)**

HDM-ASCT  
Recipients

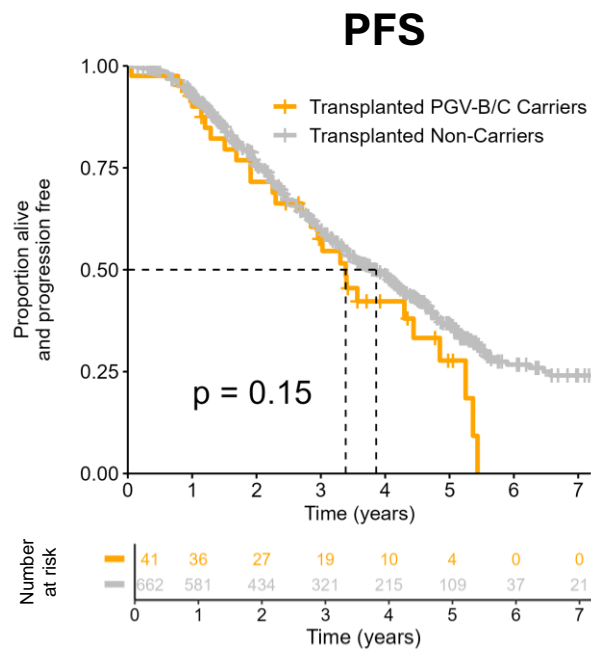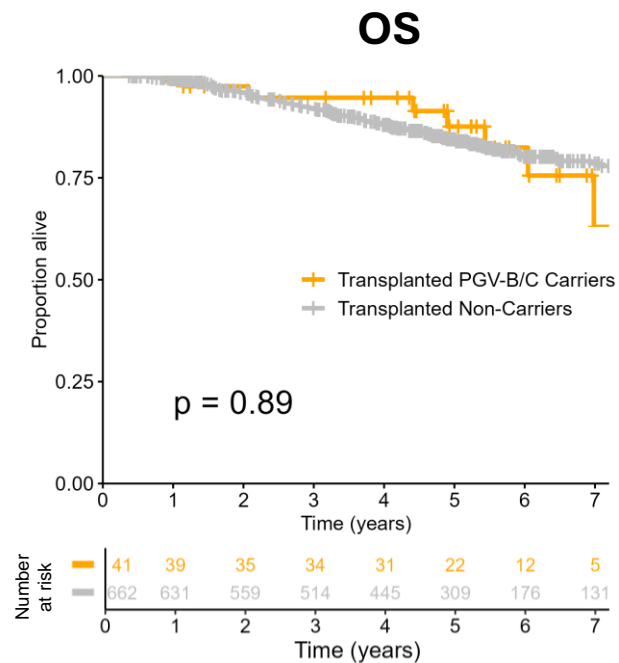

Non-transplanted  
Patients

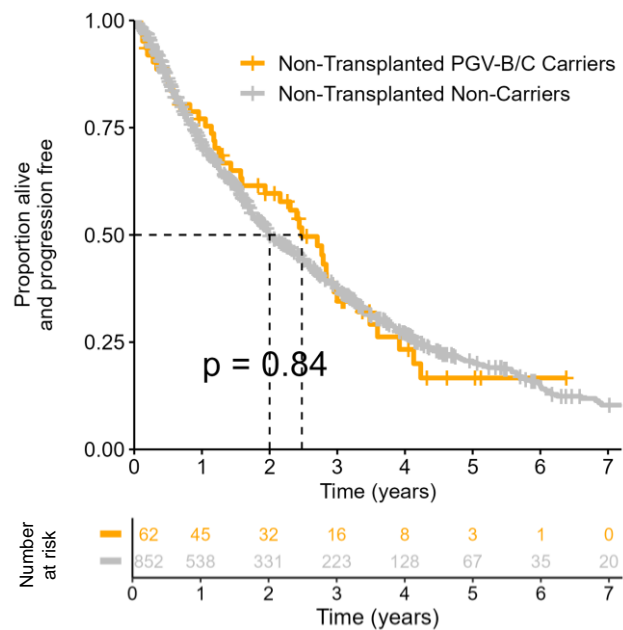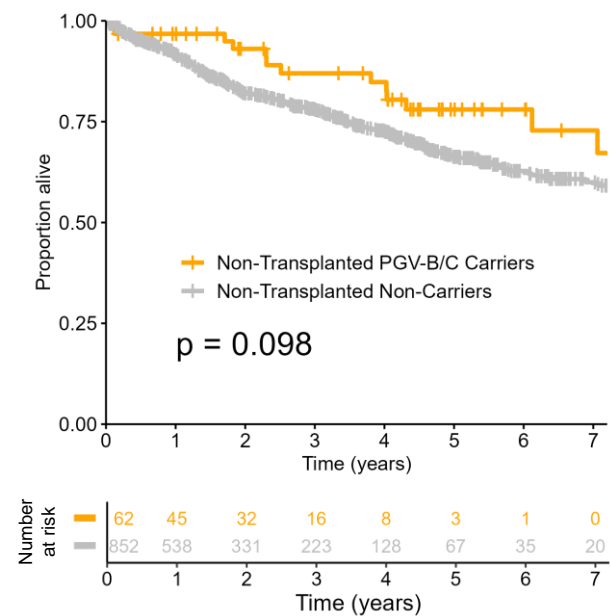

Supplement: bcd-23-0208_supplementary_figure_3_suppsf3.pdf [file bcd-23-0208_supplementary_figure_3_suppsf3.pdf]
