# Supplementary material for: Multiple Myeloma Risk and Outcomes Are Associated with Pathogenic Germline Variants in DNA Repair Genes
Source: PubMed Central journal article supplement — Blood Cancer Discov. 2024 Sep 16;5(6):428–41. doi: 10.1158/2643-3230.BCD-23-0208 (PMC11528192; doi:10.1158/2643-3230.bcd-23-0208), 2024-09-16
Supplement: bcd-23-0208_supplementary_figure_4_suppsf4.pdf [file bcd-23-0208_supplementary_figure_4_suppsf4.pdf]

**SUPPLEMENTARY FIGURE 4: Concordance of Genetically-Determined Ancestry and Self-Reported Race in a subset of patients from the Discovery Cohort (MMRF CoMMpass dataset)**

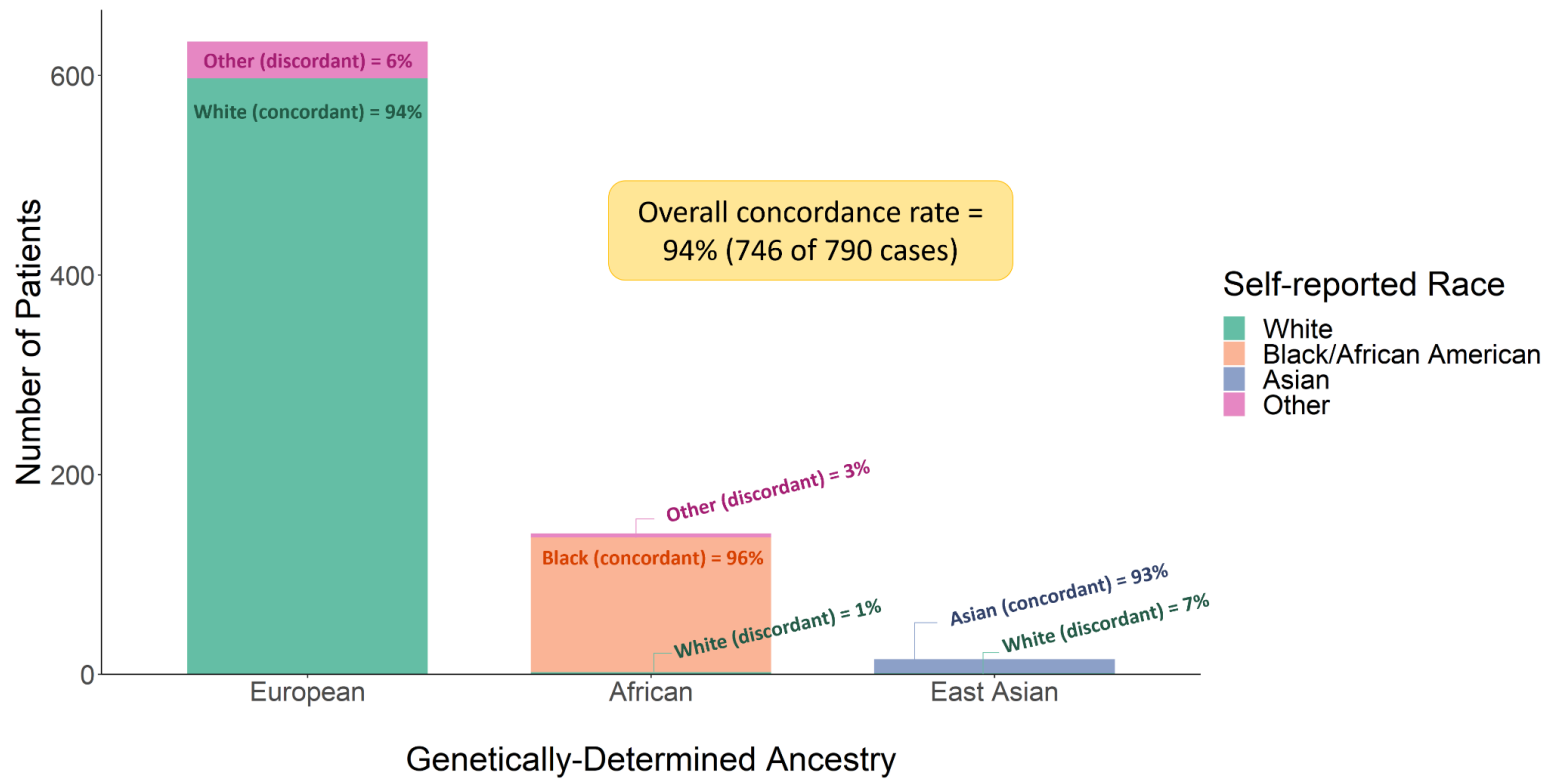

We conducted an analysis in a subset of 790 patients from the MMRF CoMMpass dataset (55% of the full cohort of 1435 patients), and compared genetically-determined ancestry against self-reported race. Cases were defined as "concordant" when genetically-determined ancestry (European, African, and East Asian) matched the corresponding self-reported race categories (White, Black/African American, and Asian, respectively). In this subset, we observed a high concordance rate of 94% (746 out of 790 cases), suggesting a strong alignment between genomic ancestry and self-reported race. This high degree of concordance is consistent with findings from other studies (PMID 27768889). Consequently, we chose to accept self-reported race as a surrogate for genetically-determined ancestry in our analysis.
